# Supplementary material for: Family History and Stroke Risk in China: Evidence from a Large Cohort Study
Source: PubMed Central journal article supplement — J Stroke. 2017 May 31;19(2):188–95. doi: 10.5853/jos.2016.01270 (PMC5466298; doi:10.5853/jos.2016.01270), 2017-05-31
Supplement: jos-2016-01270-supple1.pdf [file jos-2016-01270-supple1.pdf]

**Supplementary Table 1.** Multivariable adjusted hazard ratios (95% confidence intervals) of incident stroke associated with family history of stroke according to stroke types and gender

| Outcome                   | Gender | Family history   | Paternal history | Maternal history | Parental history | Sibling history  |
|---------------------------|--------|------------------|------------------|------------------|------------------|------------------|
|                           |        | HR (95% CI)*     |
| Total stroke <sup>†</sup> | Male   | 1.35 (1.29–1.41) | 1.34 (1.27–1.42) | 1.33 (1.26–1.41) | 1.35 (1.29–1.41) | 1.35 (1.25–1.45) |
|                           | Female | 1.33 (1.28–1.38) | 1.33 (1.26–1.40) | 1.34 (1.27–1.41) | 1.33 (1.27–1.38) | 1.39 (1.30–1.49) |
| Hemorrhagic stroke        | Male   | 1.22 (1.11–1.35) | 1.28 (1.12–1.45) | 1.22 (1.07–1.39) | 1.23 (1.11–1.37) | 1.17 (0.97–1.41) |
|                           | Female | 1.26 (1.14–1.39) | 1.29 (1.13–1.48) | 1.19 (1.05–1.36) | 1.22 (1.10–1.35) | 1.50 (1.26–1.77) |
| Ischemic stroke           | Male   | 1.40 (1.34–1.47) | 1.37 (1.29–1.46) | 1.39 (1.30–1.48) | 1.39 (1.33–1.46) | 1.42 (1.30–1.55) |
|                           | Female | 1.36 (1.30–1.42) | 1.35 (1.27–1.43) | 1.38 (1.30–1.46) | 1.36 (1.30–1.43) | 1.39 (1.29–1.51) |

HR, hazard ratio; CI, confidence interval.

\*Adjusted for age, marital status, education, residential area, smoking status, alcohol consumption, physical activity, BMI, history of hypertension, history of diabetes and siblings.

<sup>†</sup>Including hemorrhagic stroke, ischemic stroke and stroke of unknown type.
