# Supplementary material for: Family History and Stroke Risk in China: Evidence from a Large Cohort Study
Source: PubMed Central journal article supplement — J Stroke. 2017 May 31;19(2):188–95. doi: 10.5853/jos.2016.01270 (PMC5466298; doi:10.5853/jos.2016.01270), 2017-05-31
Supplement: jos-2016-01270-supple2.pdf [file jos-2016-01270-supple2.pdf]

**Supplementary Table 2.** Stratification analyses on associations between family history of stroke and incident stroke

| Subgroup                                 | HR*  | 95% CI*   | <i>P</i><br>for heterogeneity | <i>P</i><br>for interaction |
|------------------------------------------|------|-----------|-------------------------------|-----------------------------|
| Residential area                         |      |           | 0.145                         |                             |
| Rural                                    | 1.37 | 1.32–1.43 |                               |                             |
| Urban                                    | 1.31 | 1.26–1.37 |                               |                             |
| Marital status                           |      |           | 0.012                         |                             |
| Married                                  | 1.36 | 1.32–1.40 |                               |                             |
| Widowed/separated/divorced/never married | 1.22 | 1.13–1.32 |                               |                             |
| Education                                |      |           | <0.001                        | <0.001                      |
| Illiteracy or primary school             | 1.26 | 1.21–1.31 |                               |                             |
| Middle school and above                  | 1.44 | 1.38–1.50 |                               |                             |
| Smoking status                           |      |           | <0.001                        | <0.001                      |
| Not current                              | 1.30 | 1.26–1.34 |                               |                             |
| Current                                  | 1.46 | 1.38–1.54 |                               |                             |
| Alcohol consumption                      |      |           | 0.005                         | <0.001                      |
| Not current                              | 1.31 | 1.27–1.36 |                               |                             |
| Current                                  | 1.45 | 1.36–1.53 |                               |                             |
| Physical activity (MET h/day)            |      |           | <0.001                        | <0.001                      |
| <18.20                                   | 1.29 | 1.25–1.34 |                               |                             |
| ≥18.20                                   | 1.46 | 1.39–1.54 |                               |                             |
| BMI (kg/m <sup>2</sup> )                 |      |           | 0.788                         |                             |
| <24.0                                    | 1.34 | 1.28–1.40 |                               |                             |
| 24.0, 27.9                               | 1.36 | 1.30–1.42 |                               |                             |
| ≥28.0                                    | 1.32 | 1.23–1.42 |                               |                             |
| Hypertension                             |      |           | 0.035                         |                             |
| No                                       | 1.39 | 1.32–1.46 |                               |                             |
| Yes                                      | 1.30 | 1.26–1.35 |                               |                             |
| Diabetes                                 |      |           | 0.034                         |                             |
| No                                       | 1.36 | 1.32–1.40 |                               |                             |
| Yes                                      | 1.24 | 1.14–1.34 |                               |                             |

HR, hazard ratio; CI, confidence interval; MET, metabolic equivalent of task; BMI, body mass index.

\*Adjusted for age, sex, marital status, education, residential area, smoking status, alcohol consumption, physical activity, BMI, history of hypertension, history of diabetes and siblings except for the stratification factor.
