# Supplementary material for: Family History and Stroke Risk in China: Evidence from a Large Cohort Study
Source: PubMed Central journal article supplement — J Stroke. 2017 May 31;19(2):188–95. doi: 10.5853/jos.2016.01270 (PMC5466298; doi:10.5853/jos.2016.01270), 2017-05-31
Supplement: jos-2016-01270-supple3.pdf [file jos-2016-01270-supple3.pdf]

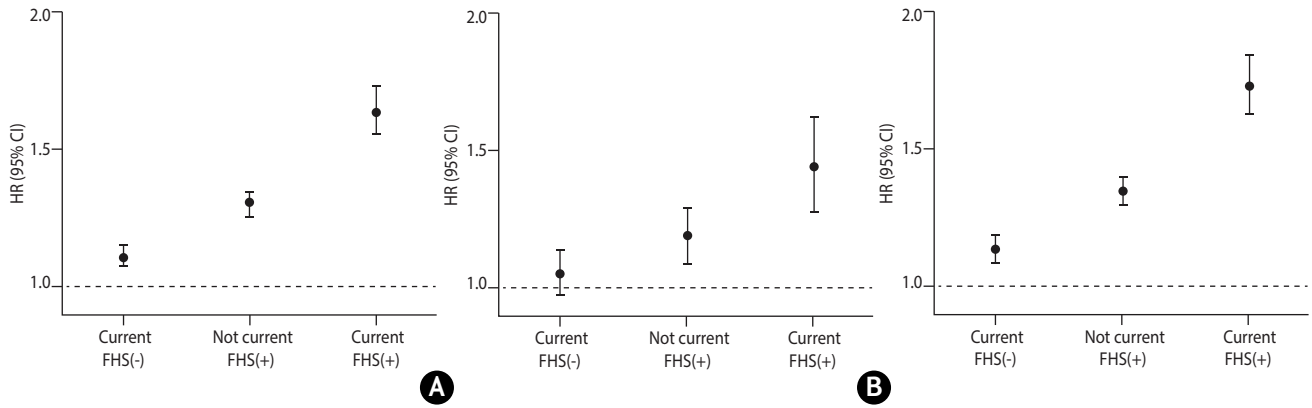

**Supplementary Figure 1.** Interaction analyses between family history of stroke and smoking status. (A) Results for total stroke; (B) results for hemorrhagic stroke; (C) results for ischemic stroke. Total stroke includes hemorrhagic stroke, ischemic stroke and stroke of unknown type. HRs and 95% CIs are adjusted for age, sex, marital status, education, residential area, alcohol consumption, physical activity, BMI, history of hypertension, history of diabetes and siblings. Round dots represent the HRs, and horizontal lines represent the corresponding 95% CIs. Current refers to current regular smoker. Not current refers to not current regular smoker. FHS(-) refers to without FHS. FHS(+) refers to with FHS. The dashed lines represent participants who are not current smokers and without FHS as reference groups. FHS, family history of stroke; HR, hazard ratio; CI, confidence interval; BMI, body mass index.
